# Supplementary material for: An essential gene signature of breast cancer metastasis reveals targetable pathways
Source: PubMed Central journal article supplement (PMC11167932; doi:10.1186/s13058-024-01855-0), 2024-06-12
Supplement: 13058_2024_1855_MOESM1_ESM.pdf [file 13058_2024_1855_MOESM1_ESM.pdf]

**Table S1. Multivariate Cox incorporating multiple prognostic signatures.**

|                                        | Coefficient | 95 % Conf.<br>(±) | Std.Error | P          | Hazard =<br>Exp(Coef.) |
|----------------------------------------|-------------|-------------------|-----------|------------|------------------------|
| <i>Kessler gene expression dataset</i> |             |                   |           |            |                        |
| essential                              | -0.037      | 0.129             | 0.066     | 0.57       | 0.964                  |
| 70-gene                                | -0.017      | 0.177             | 0.09      | 0.85       | 0.983                  |
| GGI                                    | 0.378       | 0.204             | 0.104     | 0.00028    | 1.46                   |
| <i>Pereira gene expression dataset</i> |             |                   |           |            |                        |
| essential                              | -0.028      | 0.105             | 0.053     | 0.6        | 0.973                  |
| 70-gene                                | -0.053      | 0.154             | 0.078     | 0.5        | 0.949                  |
| GGI                                    | 0.401       | 0.188             | 0.096     | 0.000028   | 1.494                  |
| <i>Staaf gene expression dataset</i>   |             |                   |           |            |                        |
| essential                              | 0.277       | 0.061             | 0.031     | 0.0000011  | 1.32                   |
| 70-gene                                | -0.292      | 0.061             | 0.031     | 0.00000091 | 0.747                  |
| GGI                                    | -0.096      | 0.06              | 0.031     | 0.0019     | 0.909                  |

essential signature, the 264 genes featured in the present study; 70-gene signature from van't Veer et al. (PMID:11823860); GGI, Genomic Grade Index signature, from Loi et al. (PMID:17401012). For each signature, signature scores are normalized to standard deviations from the median. Adverse event for Kessler dataset is distant metastasis-free survival; for Pereira, disease-specific survival; for Staaf, overall survival.
